# Supplementary material for: Predicting human odor perception represented by continuous values from mass spectra of essential oils resembling chemical mixtures
Source: PLoS One. 2020 Jun 19;15(6):e0234688. doi: 10.1371/journal.pone.0234688 (PMC7304616; doi:10.1371/journal.pone.0234688)
Supplement: S2 Table — (CSV) [file pone.0234688.s002.csv]

Descriptor Name	Herbal	Citrus	Floral	Exotic	Resin	Spice	Woody
Spicy	13	0	0	1	2	12	3
Sweet	15	12	10	6	2	7	6
Woody	6	1	3	2	2	6	0
Root	1	0	0	1	0	0	0
Green	3	0	2	0	5	1	0
Anisic	1	0	0	0	0	2	0
Fresh	5	6	5	0	9	3	2
Minty	2	1	0	0	0	1	0
Herbaceous	7	5	8	0	0	3	0
warm	4	0	3	0	1	11	1
rich	2	3	3	0	0	1	0
fatty	2	0	0	0	0	2	1
Floral	2	4	8	2	0	1	5
rose	1	2	4	0	0	0	0
citrus	1	7	0	0	0	2	2
citronellal	1	1	0	0	0	0	2
grassy	1	2	0	0	0	0	0
tea-like	1	0	2	0	0	0	0
bitter	4	3	4	3	1	2	2
pungent	1	0	0	0	1	2	0
terpene	1	3	0	0	1	1	4
light	1	0	1	0	0	0	0
peppery	2	0	0	0	1	2	0
aromatic	2	0	0	2	1	2	1
eucalyptol	1	0	0	0	0	1	0
clary sage	0	2	0	0	0	1	0
Lemon	0	6	0	0	3	1	0
Fruity	0	4	6	1	2	0	0
pleasant	0	3	0	0	0	1	0
orange	0	4	0	0	0	1	0
Balsamic	0	0	2	3	8	2	5
Leafy	0	0	1	0	2	0	0
Resinous	0	0	0	1	2	0	1
Earthy	1	0	0	3	0	0	0
Pine	0	0	0	0	6	0	3
Oily	0	0	0	0	2	0	1
anethole	1	0	0	0	0	1	0
Cooling	1	1	0	0	0	0	0
